# Supplementary material
Source: PubMed Central journal article supplement (PMC3984302)
Supplement: cc-13-1041-s01.pdf [file cc-13-1041-s01.pdf]

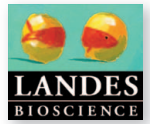

## **Supplemental Material to:**

**Lu-Zhe Pan, Dae-Gyun Ahn, Tanveer Sharif,  
Derek Clements, Shashi A Gujar, and Patrick WK Lee**

**The NAD<sup>+</sup> synthesizing enzyme nicotinamide  
mononucleotide adenylyltransferase 2 (NMNAT-2) is a p53  
downstream target**

**Cell Cycle 2014; 13(7)**

**<http://dx.doi.org/10.4161/cc.28128>**

**<http://www.landesbioscience.com/journals/cc/article/28128>**

## SUPPLEMENTARY INFORMATION

### MATERIALS AND METHODS

**Cell lines and reagents.** All human cell lines utilized in this study were purchased from American Type Culture Collection (ATCC). U2OS (human osteosarcoma cell) and HCT116 (human colon cancer cell) cells were cultured in Dulbecco's modified eagle medium (Gibco). H1299 human lung cancer cell line was grown in RPMI 1640 medium. All culture media were supplemented with 10% fetal bovine serum (FBS) (Invitrogen) and antimycotics and antibiotics (Invitrogen). Cells were grown in a humidified incubator with 5% CO<sub>2</sub> at 37 °C. Actinomycin D (Act. D), doxorubicin (Dox) and etoposide (Etp) were purchased from Sigma-Aldrich and Nutlin-3 from Roche. Antibodies against p53 (DO-1), normal mouse IgG and  $\beta$ -actin were purchased from Santa Cruz Biotechnology. NMNAT-2 antibody was purchased from Abcam.

**Plasmid construction.** The p53 inducible gene expression system was constructed by modifying the TRIPZ-Tet On vector from Openbiosystems. pTRIPZ vector was originally designed for inducible expression of shRNAmir. To convert it into a gene expressing vector, the shRNA cassette was replaced with p53 open reading frame. Briefly, TRIPZ vector was digested with *AgeI* and *MluI* restriction enzymes and the vector backbone was recovered. p53 coding sequence was amplified by PCR from IMR-90 cell (human lung fibroblast with wild-type p53 gene) cDNA with forward primer containing *AgeI* linker sequence and reverse primer containing *MluI* linker sequence. PCR product was digested with *AgeI* and *MluI* then ligated with pre-cut TRIPZ vector. The clone was confirmed by DNA sequencing. The new p53 inducible vector was named TPZ-p53-Tet On and used for generating lentiviruses. H1299 human lung cancer cell (p53 null) was transduced with TPZ-p53-Tet On construct. Primers used for amplification of p53 are listed in supplementary table S1. shRNAs for knock-down of NMNAT-2 and p53 were cloned into pSMP vector (Openbiosystems). For each target gene, at least three shRNA sequences were designed. Oligomers containing each shRNA sequence were amplified by PCR using SMP-forward and SMP-reverse primers, which contain *XhoI* and *EcoRI* restriction site, respectively. PCR products and SMP vector were digested with *XhoI* and *EcoRI* and ligated together. Primer sequences and shRNA sequences are listed in supplementary table S1. For luciferase reporter plasmids containing NMNAT-2 p53-binding sites, NF- $\kappa$ B luciferase reporter vector, pNF- $\kappa$ B-luc (Clontech), was digested with *MluI* and *BglII* to remove NF- $\kappa$ B responsive sequence. Forward and reverse primers (about 60 bases) containing NMNAT-2 p53-binding sites (20 bases) with extra linker sequences of *MluI* (forward oligomers) and *BglII* (reverse oligomers) were annealed. NMNAT-2 p53 binding site #1 (p53BS#1) and p53BS#2, either wild-type or mutant, were cloned into luciferase reporter vector (NF- $\kappa$ B RE removed). All constructs were confirmed by DNA sequencing.

**Real-time quantitative PCR.** Total RNA was extracted with Trizol reagent (Invitrogen) and RNA-containing phase was further purified using PureLink RNA extraction kit (Invitrogen). cDNAs were reverse transcribed using Superscript II reverse transcriptase (Invitrogen) and subjected to real-time quantitative PCR reaction. Real-time quantitative PCR was carried out using Quantifast Sybr-green qPCR kit (Qiagen) and Stratagene MX 300 thermocycler. Data were analysed with MxPro software (Stratagene). mRNA levels were normalized to actin or GAPDH mRNAs as internal controls. PCR primers used for detecting NAMPT, NMNAT-1, NMNAT-2, NMNAT-3 and p53 are listed in supplementary table S1.

**Flow cytometry analysis.** The fixation and permeabilization of cells for intra-cellular staining for NMNAT-2 was conducted using Foxp3 staining buffer set (eBioscience) following the manufacturer's instructions. With the use of an anti-NMNAT-2 primary antibody and Alexa Fluor 488 secondary antibody (Invitrogen), the expression of NMNAT-2 was analysed with FACS Calibur flow cytometer (BD Biosciences), CellQuest Pro (BD Biosciences), FCS Express V3 (DeNovo Software), and ModFit LT software (Verity Software House).

## NMNAT-2 is a new p53 target gene

Table S1. Primer and shRNA sequences used in this study

| Name                                          | Sequences                                                                |
|-----------------------------------------------|--------------------------------------------------------------------------|
| <b>Primers for cloning</b>                    |                                                                          |
| TPZ-p53 forward                               | GTCAGAACCGGTTTAATTAAGCCACCATGGAGGAGCCGAGTCAGATCC                         |
| TPZ-p53 reverse                               | TGAGACACGCGTATCGATTAGTCTGAGTCAGGCCCTTCTG                                 |
| NMNAT-2 p53 BS#1 WT forward                   | GCATACGCGTAGGTTTGGGCTGGAGAGTCAAGAACAAAGTCGTGGCTTGCCAAGTGTGGACCACATGGCGAT |
| NMNAT-2 p53 BS#1 WT forward                   | GCTAAGATCTATCGCCATGTGGTCCACACTTGGCAAGCCACGACTTGTCTTGACTCTCCAGCCCAAACCT   |
| NMNAT-2 p53 BS#1 mutant forward               | GCATACGCGTAGGTTTGGGCTGGAGAGTCAAGAATAATTCTGGTTTTCCAAGTGTGGACCACATGGCGAT   |
| NMNAT-2 p53 BS#1 mutant forward               | GCTAAGATCTATCGCCATGTGGTCCACACTTGGAAAACCAAGTAATTCTTGACTCTCCAGCCCAAACCT    |
| NMNAT-2 p53 BS#2 WT forward                   | GCATACGCGTTGGGATCAAACCTATTACAGTGGCATGTATGGACTTGTGAAGGACAGATCATTCCAGCT    |
| NMNAT-2 p53 BS#2 WT forward                   | GCTAAGATCTAGCTGGAATGATCTGTCTCCACAAGTCCATACATGCCACTGTAATAAGTTTGATCCCA     |
| NMNAT-2 p53 BS#2 mutant forward               | GCATACGCGTTGGGATCAAACCTATTACAGTGGAAATATGGAATTATGGAAGGACAGATCATTCCAGCT    |
| NMNAT-2 p53 BS#2 mutant forward               | GCTAAGATCTAGCTGGAATGATCTGTCTCCATAATTCCATATATCCACTGTAATAAGTTTGATCCCA      |
| <b>Primers for Chip analysis</b>              |                                                                          |
| NMNAT-2 p53 BS#1 Chip forward                 | GCTAAGGGCCAGAGAGTTT                                                      |
| NMNAT-2 p53 BS#1 Chip reverse                 | GTGGCAGAGGCAAGATTCA                                                      |
| NMNAT-2 p53 BS#2 Chip forward                 | GTGCCAGACACTGGACAAGA                                                     |
| NMNAT-2 p53 BS#2 Chip reverse                 | CCCTTCAAATCCAACCTGC                                                      |
| p21 Chip forward                              | AGGTCAGCTGCGTTAGAGGA                                                     |
| p21 Chip reverse                              | TCTGTGCCTGAAACATTTGC                                                     |
| MDM2 forward                                  | TCGGGTCAGTAGTGTGAACG                                                     |
| MDM2 reverse                                  | CACTGAACACAGCTGGGAAA                                                     |
| <b>Primers for real-time quantitative PCR</b> |                                                                          |
| p53 forward                                   | CACATGACGGAGTTGTGAG                                                      |
| p53 reverse                                   | TGGTACAGTCAGAGCCAACCT                                                    |
| GAPDH forward                                 | GAAGGTGAAGGTCGGAGTC                                                      |
| GAPDH reverse                                 | GAAGATGGTGATGGGATTTC                                                     |
| NAMPT forward                                 | ATCCTGTTCCAGGCTATTCTGT                                                   |
| NAMPT reverse                                 | CCCCATATTTTCTCACACGCAT                                                   |
| NMNAT-1 forward                               | TCATCATGGCAGAACTTGCT                                                     |
| NMNAT-1 reverse                               | TGGCACAGCTTTTGTTTTTG                                                     |
| <sup>a</sup> NMNAT-2 common forward           | GGCACCGTCTCATCATGTGTCCAG                                                 |
| <sup>a</sup> NMNAT-2 common reverse           | CCCAAGATCTTGGCTGCAGTG                                                    |
| NMNAT-3 forward                               | CCCTGCAAATAGCAGCTACC                                                     |
| NMNAT-3 reverse                               | TGAGAAGCTGCGAGGCTTTT                                                     |
| <sup>b</sup> NMNAT-2-TV1 specific forward     | ATGACCGAGACCACCAAGAC                                                     |
| <sup>b</sup> NMNAT-2-TV2 specific forward     | TGGAAATCCAGGAACTAGAGGA                                                   |
| <sup>b</sup> NMNAT-2 specific reverse         | CCATAGGAGTCGTGGACAGG                                                     |
| <b>shRNA sequences for gene knock-down</b>    |                                                                          |
| SMP-Control shRNA                             | CGCTACACAAATCAGCGATTTATAGTGAAGCCACAGATGTATAAATCGCTGATTTGTAGCG            |
| SMP-p53 shRNA                                 | CGGAGGATTTTCATCTTTGATTTAGTGAAGCCACAGATGTAATACAAGAGATGAAATCCTCCA          |
| SMP-NMNAT-2 shRNA                             | AGCCACTGTTAGGTTTCTTTATAGTGAAGCCACAGATGTATAAAGGAAACCTAACAGTGCC            |

<sup>a</sup>primers amplifying common region of NMNAT-2 variants, thereby detecting all transcriptional variants

<sup>b</sup>primers amplifying specific NMNAT-2 transcriptional variants, tv1 and tv2
